# Supplementary material for: The enhanced future Flows and Groundwater dataset: development and evaluation of nationally consistent hydrological projections based on UKCP18
Source: Copernicus journal article supplement (doi:10.5194/essd-15-2391-2023), 2023-06-09
Supplement: Supplementary file 2 [file essd-15-2391-2023-supplement.zip]

Archive with 3 entries (3 files):
- eFlaG_RCM_PE_Experiments_FINAL_ForESSD.pdf
- essd-15-2391-2023-supplement-title-page.pdf
- ESSD Paper Supplementary Information FINAL DRAFT.pdf
