# Supplementary material for: The enhanced future Flows and Groundwater dataset: development and evaluation of nationally consistent hydrological projections based on UKCP18
Source: Copernicus journal article supplement (doi:10.5194/essd-15-2391-2023), 2023-06-09
Supplement: Supplementary file 2 [file essd-15-2391-2023-supplement.zip › essd-15-2391-2023-supplement-title-page.pdf]

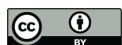

## *Supplement of*

# **The enhanced future Flows and Groundwater dataset: development and evaluation of nationally consistent hydrological projections based on UKCP18**

**Jamie Hannaford et al.**

*Correspondence to:* Jamie Hannaford (jaha@ceh.ac.uk) and Jonathan D. Mackay (joncka@bgs.ac.uk)

- [essd-15-2391-2023-supplement-title-page.pdf](#)
- [ESSD Paper Supplementary Information FINAL DRAFT.pdf](#)
- [eFlaG\\_RCM\\_PE\\_Experiments\\_FINAL\\_ForESSD.pdf](#)

The copyright of individual parts of the supplement might differ from the article licence.
